1 **The human auditory brainstem response to running**  
2 **speech reveals a subcortical mechanism for**  
3 **selective attention**

4

5 **Antonio Elia Forte, Octave Etard and Tobias Reichenbach\***

6 Department of Bioengineering and Centre for Neurotechnology, Imperial College London, South  
7 Kensington Campus, SW7 2AZ, London, U.K.

8 \*To whom correspondence should be addressed (email: reichenbach@imperial.ac.uk)

9

10

11 **Abstract**

12 **Humans excel at selectively listening to a target speaker in background noise such as competing**  
13 **voices. While the encoding of speech in the auditory cortex is modulated by selective attention, it**  
14 **remains debated whether such modulation occurs already in subcortical auditory structures.**  
15 **Investigating the contribution of the human brainstem to attention has, in particular, been**  
16 **hindered by the tiny amplitude of the brainstem response. Its measurement normally requires a**  
17 **large number of repetitions of the same short sound stimuli, which may lead to a loss of**  
18 **attention and to neural adaptation. Here we develop a mathematical method to measure the**  
19 **auditory brainstem response to running speech, an acoustic stimulus that does not repeat and**  
20 **that has a high ecological validity. We employ this method to assess the brainstem's activity**  
21 **when a subject listens to one of two competing speakers, and show that the brainstem response**  
22 **is consistently modulated by attention.**

23

## 24 **Introduction**

25 It is well known that selective attention to one of several competing acoustic signals affects the  
26 encoding of sound in the auditory cortex (Shinn-Cunningham 2008; Hackley et al. 1990; Choi et al.  
27 2013; Fritz et al. 2007b; Hillyard et al. 1973; Womelsdorf & Fries 2007; Fritz et al. 2007a; Näätänen  
28 et al. 2001). Because extensive auditory centrifugal pathways carry information from central to more  
29 peripheral levels of the auditory system (Winer 2006; Pickels 1988; Song et al. 2008; Bajo et al.  
30 2010), neural activity in the subcortical structures may contribute to attention as well. Previous  
31 attempts to determine an attentional modulation from recording the auditory brainstem response  
32 through scalp electrodes have, however, yielded highly inconclusive results.

33 In particular, one investigation found that selective attention alters the brainstem's response to  
34 the fundamental frequency of a speech signal (Galbraith et al. 1998), while another study concluded  
35 that this response is modulated in an unsystematic but subject-specific manner (Lehmann &  
36 Schönwiesner 2014) and a third recent experiment did not find a significant attentional effect  
37 (Varghese et al. 2015). Results on the effects of attention on the auditory-brainstem response to short  
38 clicks or pure tones are similarly inconclusive (Brix 1984; Gregory et al. 1989; Hoormann et al. 2000;  
39 Galbraith et al. 2003). These inconsistencies may result from a main experimental limitation in these  
40 studies: because the brainstem response is tiny, its measurement requires hundred- to thousandfold  
41 repetition of the same sound. The large number of repetitions may lead to difficulties for subjects in  
42 sustaining selective attention, to adaptation in the nervous system, and to a reduction in efferent  
43 feedback (Lasky 1997; Neupane et al. 2014).

44 To overcome this limitation, we develop here a method to measure the auditory brainstem's  
45 response to natural running speech that does not repeat. We then use this method to assess the  
46 modulation of the auditory brainstem response to one of two competing speakers by selective  
47 attention.

## 48 **Results**

49 Assessing the brainstem's response to continuous non-repetitive speech does not allow to average over  
50 many repeated presentations of the same sound. Instead, we sought to quantify the brainstem's  
51 response to the fundamental frequency of speech. Neuronal activity in the brainstem, and in particular  
52 in the inferior colliculus, can indeed phase lock to the periodicity of voiced speech (Skoe & Kraus  
53 2010). The fundamental frequency of running speech varies over time, however, compounding a  
54 direct read-out of the evoked brainstem response.

55 To overcome this difficulty, we employed empirical mode decomposition (EMD) of the  
56 speech stimuli to identify an empirical mode that, at each time instance, oscillates at the fundamental  
57 frequency of the speech signal (Huang & Pan 2006) (Methods). This mode is a nonlinear and

58 nonstationary oscillation with a temporally-varying amplitude and frequency that we refer to as the  
59 'fundamental waveform' of the speech stimulus (Figure 1a).

60 We then recorded the brainstem response to running non-repetitive speech stimuli of several  
61 minutes in duration from human volunteers through scalp electrodes. We cross-correlated the obtained  
62 recording with the fundamental waveform of the speech signal (Figure 1b). Because the brainstem  
63 response may occur at a phase that is different from that of the fundamental waveform, we also  
64 correlated the neural signal to the Hilbert transform of the fundamental waveform that has a phase  
65 delay of  $90^\circ$ . The two correlations can be viewed as the real and imaginary part of a complex  
66 correlation function that can trace the brainstem response at any phase delay. The amplitude of the  
67 complex correlation informs then on the strength of the brainstem response.

68 We found that the amplitude of the complex correlation peaked at a mean latency of  $9.3 \pm 0.7$   
69 ms, and our statistical analysis showed that this peak was significantly different from the noise in  
70 fourteen out of sixteen subjects ( $p < 0.05$ , Methods). The average value of the correlation at the peak  
71 was  $0.015 \pm 0.003$ . Moreover, the latency agrees with that found previously regarding the brainstem's  
72 response to short repeated speech stimuli (Skoe & Kraus 2010). We checked that the response does  
73 not contain a stimulus artifact or a contribution from the cochlear microphonic, and that the latency of  
74 the response is not affected by the processing of the speech signal or of the neural response (Methods;  
75 Figure 1–figure supplement 1). This demonstrates that the brainstem's response to continuous speech  
76 can be reliably extracted through the developed method, and the response can be characterized  
77 through the latency and amplitude of the correlation's peak.

78 Armed with the ability to quantify the brainstem's response to running non-repetitive speech,  
79 we sought to investigate if this neural activity is affected by selective attention. Employing a well-  
80 established paradigm of attention to one of two speakers (Ding & Simon 2012), we presented  
81 volunteers diotically with two concurrent speech streams of equal intensity, one by a male and another  
82 by a female voice. For parts of the speech presentation subjects attended the male voice and ignored  
83 the female voice, and *vice versa* for the remaining parts.

84 We quantified the brainstem's response to both the male and the female voice by extracting  
85 the fundamental waveforms of both speech signals and correlating the neural recording separately to  
86 both. We found that the latency of the response was unaffected by attention: the response to the  
87 unattended speaker occurred  $0.8 \pm 0.5$  ms later than that to the attended speaker, which was not  
88 statistically significant ( $p = 0.2$ ; average over the responses to the male and the female voice as well  
89 as all subjects).

90 In contrast, all subjects showed a larger response of the auditory brainstem to the male voice  
91 when attending rather than ignoring it (Figure 2a). The difference in the responses was statistically

92 significant in nine of the fourteen subjects ( $p < 0.05$ ). The brainstem's response to the attended female  
93 speaker similarly exceeded that to the unattended female voice in all but one subject, with eight  
94 subjects showing a statistically-significant difference ( $p < 0.05$ ; Figure 2b). The ratio of the  
95 brainstem's response to attended and to ignored speech, averaged over all subjects, was  $1.5 \pm 0.1$  and  
96  $1.6 \pm 0.2$  for the male and for the female speaker, respectively. Both ratios were significantly different  
97 from unity ( $p < 0.001$ , male voice;  $p < 0.01$ , female voice). The male and the female voice elicited a  
98 comparable attentional modulation: the difference between the corresponding ratios was insignificant  
99 ( $p = 0.7$ ). The magnitude of the brainstem's response was hence significantly enhanced through  
100 attention, and consistently so across subjects and speakers.

## 101 **Discussion**

102 Our results show that the human auditory brainstem response to continuous speech is larger when  
103 attending than when ignoring a speech signal, and consistently so across different subjects and  
104 speakers. In particular, the strength of the phase locking of the neural activity to the pitch structure of  
105 speech is larger for an attended than for an unattended speech stream. In contrast, we did not observe  
106 a difference in the latency of this activity.

107 The fundamental waveform of speech that we have obtained from EMD has a temporally  
108 varying frequency and amplitude and is therefore not a simple component of Fourier analysis. While  
109 it may be obtained from short-time Fourier transform or wavelet analysis, both methods suffer from  
110 an inherently limited time-frequency resolution that makes them inferior to the EMD analysis (Huang  
111 & Pan 2006).

112 Because we have employed a diotic stimulus presentation in which the same acoustical  
113 stimulus was presented to each ear, the attentional modulation cannot result from a general  
114 modulation of the brainstem's activity to acoustic stimuli between the two hemispheres. Moreover,  
115 although the fundamental frequencies of the two competing speakers differ at most time points, their  
116 spectra largely overlap. The attentional modulation can therefore not result from a broad-band  
117 modulation of the neural activity either. Instead, the attentional effect must result from a modulation  
118 of the brainstem's response to the specific pitch structure of a speech stimulus.

119 The brainstem response to the pitch of continuous speech that we have measured can reflect a  
120 response both to the fundamental frequency of speech as well as to higher harmonics. Indeed,  
121 previous studies have found that the brainstem responds at the fundamental frequency of a speech  
122 stimulus even when that frequency itself is removed from the acoustic signal (Galbraith & Doan  
123 1995), or when it cancels out due to presentation of stimuli with opposite polarities and averaging of  
124 the obtained responses (Aiken & Picton 2008). The attentional modulation of the brainstem response  
125 can thus reflect a modulation of the response to the fundamental frequency itself or to higher

126 harmonics. Moreover, attentional modulation of higher harmonics may depend on frequency as shown  
127 recently in recordings of otoacoustic emissions from the inner ear (Maison et al. 2001).

128 The attentional modulation of the brainstem's response to the pitch of a speaker may result  
129 from an enhancement of the neural response to an attended speech signal, from the suppression of the  
130 response to an ignored speech stimulus, or from both. Further investigation into this issue may  
131 compare brainstem responses to speech when attending to the acoustical signal and when attending to  
132 a visual stimulus (Woods et al. 1992; Karns & Knight 2009; Saupe et al. 2009).

133 The response at the fundamental frequency of speech can result from multiple sites in the  
134 brainstem (Chandrasekaran & Kraus 2010). However, we observed a single peak with a width of a  
135 few ms in the correlation of the neural signal to the fundamental waveform of speech. The brainstem  
136 response to running speech that we have measured here can therefore only reflect neural sources  
137 whose latencies vary by a few ms or less from the peak latency. . The neural delay of about 9 ms as  
138 well as the similarity of the speech-evoked brainstem response to the frequency-following response  
139 suggest that the main neural source may be in the inferior colliculus (Sohmer et al. 1977). The  
140 attentional effect that we have observed may then result from the multiple feedback loops between the  
141 inferior colliculus, the medial geniculate body and the auditory cortex (Huffman & Henson 1990).

142 Our study provides the mathematical tools to analyse the brainstem response to complex, real  
143 world stimuli such as speech. Since our method does not require artificial and repeated stimuli, it  
144 fosters sustained attention and avoids potential neural adaptation. This method can therefore pave the  
145 way to further explore how the brainstem contributes to the processing of complex real-world acoustic  
146 environments. It may also be relevant for better understanding and diagnosing the recently discovered  
147 cochlear neuropathy or 'hidden hearing loss' (Kujawa & Liberman 2009). Because the latter alters the  
148 brainstem's activity (Schaeffe & McAlpine 2011; Mehraei et al. 2016), assessing the auditory  
149 brainstem response to speech as well as its modulation by attention may further clarify the origin,  
150 prevalence and consequences of such poorly understood supra-threshold hearing loss.

151

## 152 **Methods**

153 **Participants.** 16 healthy adult volunteers aged 18 to 32, eight of which were female, participated in  
154 the study. All subjects were native English speakers and had no history of hearing or neurological  
155 impairments. All participants had pure-tone hearing thresholds better than 20 dB hearing loss in both  
156 ears at octave frequencies between 250 Hz and 8 kHz. Each subject provided written informed  
157 consent. All experimental procedures were approved by the Imperial College Research Ethics  
158 Committee.

159 **Auditory brainstem recordings to running speech.** Samples of continuous speech from a male and  
160 a female speaker were obtained from publicly available audiobooks (<https://librivox.org>). All samples  
161 had a duration of at least two minutes and ten seconds; some were slightly longer to end upon  
162 completion of a sentence. To construct speech samples with two competing speakers, samples from  
163 the male and from the female speaker were normalized to the same root-mean-square amplitude and  
164 then superimposed.

165 Participants were placed in a comfortable chair in an acoustically and electrically insulated  
166 room (IAC Acoustics, U.K.). A personal computer outside the room controlled audio presentation and  
167 data acquisition. Speech stimuli were presented at a sampling frequency of 44.1 kHz through a high-  
168 performance sound card (Xonar Essence STX, Asus, U.S.A.). Stimuli were delivered diotically  
169 through insert earphones (ER-3C, Etymotic, U.S.A.) at a level of 78 dB(C) SPL (C-weighted  
170 frequency response). Sound intensity was calibrated with an ear simulator (Type 4157, Brüel & Kjaer,  
171 Denmark). All subjects reported that the stimulus level was comfortable.

172 The response from the auditory brainstem was measured through five passive Ag/AgCl  
173 electrodes (Multitrode, BrainProducts, Germany). Two electrodes were positioned at the cranial  
174 vertex (Cz), two further electrodes were placed on the left and right mastoid processes, and the  
175 remaining electrode was positioned on the forehead to measure the ground. The impedance between  
176 each electrode and the skin was reduced to below 5 k $\Omega$  using abrasive electrolyte-gel (Abralyt HiCl,  
177 Easycap, Germany). The electrode on the left mastoid, at the cranial vertex and the ground electrode  
178 were connected to a bipolar amplifier with low-level noise and a gain of 50 (EP-PreAmp,  
179 BrainProducts, Germany). The remaining two electrodes were connected to a second identical bipolar  
180 amplifier. The output from both bipolar amplifiers was fed into an integrated amplifier (actiCHamp,  
181 BrainProducts, Germany) where it was low-pass filtered through a hardware anti-aliasing filter with a  
182 corner frequency of 4.9 kHz and sampled at 25 kHz. The audio signals were measured by the  
183 integrated amplifier as well through an acoustic adapter (Acoustical Stimulator Adapter and StimTrak,  
184 BrainProducts, Germany). The electrophysiological data were acquired through PyCorder  
185 (BrainProducts, Germany). The simultaneous measurement of the audio signal and the brainstem  
186 response from the integrated amplifier was employed to temporally align both signals to a precision of  
187 less than 40  $\mu$ s, the inverse of the sampling rate (25 kHz).

188 **Experimental design.** In the first part of the experiment, each volunteer listened to four speech  
189 samples of the female speaker only. Comprehension questions were asked at the end of each part in  
190 order to verify the subject's attention to the story.

191 The second part of the experiment employed eight samples of speech that contained both a  
192 male and a female voice. During the presentation of the first four samples, subjects were asked to  
193 attend either the male or the female speaker. Volunteers were then presented with the next four speech

194 samples and asked to attend to the speaker that they had ignored earlier. Whether the subject was  
195 asked to attend first to the male or to the female voice was determined randomly for every subject.  
196 Comprehension questions were asked after each sample.

197 **Computation of the fundamental waveform of speech.** The fundamental waveform of each speech  
198 sample with a single speaker was computed through a custom-written Matlab program (code available  
199 on Github; Forte 2017). The fundamental waveform of a speech sample with two speakers followed  
200 from the two corresponding samples with a single speaker only.

201 First, each speech signal was downsampled to 8,820 Hz, low-pass filtered at 1,500 Hz (FIR,  
202 transition band 1,500 – 1,650 Hz, stopband attenuation -80 dB, passband ripple 1 dB, order 296) and  
203 time-shifted to compensate for the filter delay. Silent parts between words were identified by  
204 computing the envelope of the speech signal. Each part where the envelope was less than 10% of the  
205 maximal value found in the speech was considered silent, and the speech signal there was set to zero.

206 Second, the instantaneous fundamental frequency of the voiced parts of the speech signal was  
207 detected through the autocorrelation method, employing rectangular windows of 50 ms duration with  
208 a successive overlap of 49 ms. Speech segments that yielded a fundamental frequency outside the  
209 range of 60 Hz to 400 Hz, or in which the fundamental frequency varied by more than 10 Hz between  
210 two successive windows were considered voiceless. The speech segments that corresponded to voiced  
211 speech, as well as their fundamental frequency, were thus obtained. The fundamental frequency of  
212 each segment was interpolated through a cubic spline, and varied between 100 and 300 Hz in each  
213 segment. Note that this method yields the fundamental frequency but not by itself the fundamental  
214 wavemode.

215 Third, the voiced speech segments were analysed through the Hilbert-Huang transform. The  
216 latter is an adaptive signal processing based on empirical basis functions and can thus be better suited  
217 for analysing nonlinear and nonstationary signals such as speech than Fourier analysis (Huang & Pan  
218 2006). The transform consists of two parts. First, empirical mode decomposition extracts intrinsic  
219 mode functions (IMFs) that satisfy two properties: (i) the numbers of extrema and zero crossings are  
220 either equal or differ by one; (ii) the mean of the upper and lower envelope vanishes. The signal  
221 follows as the linear superposition of the IMFs. Second, the Hilbert spectrum of each IMF is  
222 determined, which yields, in particular, the mode's instantaneous frequency. This analysis was  
223 performed for each short segment of voiced speech, that is, for each part of voiced speech that was  
224 preceded and followed by a pause or voiceless speech.

225 Fourth, the fundamental frequency of each short speech segment was compared to the  
226 instantaneous frequencies of the segment's IMFs at each individual time point. All IMFs with an  
227 instantaneous frequency that differed by less than 20% from the segment's fundamental frequency  
228 were determined, and the IMF with the largest amplitude was therefrom selected as the fundamental

229 wavemode of that segment and at that time point (Huang & Pan 2006). If no IMF had an  
230 instantaneous frequency within 20% of the fundamental frequency, or if a speech segment was  
231 unvoiced, that time point was assigned a fundamental waveform of zero. The fundamental waveforms  
232 obtained at the different time points were combined through cosine crossfading functions with a  
233 window width of 10 ms to obtain the fundamental waveform of the speech signal. The Hilbert  
234 transform of that fundamental waveform was computed as well.

235 To control for latency changes in the acoustic signal induced by the subsequent processing  
236 steps, and in particular by the involved frequency filtering, the cross-correlation between the original  
237 speech signal and the fundamental waveform as well as with its Hilbert transform was computed  
238 (Figure 1–figure supplement 1a). The cross-correlations show that the fundamental waveform has no  
239 latency change and no phase difference with respect to the original speech stimulus.

240 **Analysis of the auditory-brainstem response.** The brainstem responses from the two measurement  
241 channels were averaged. A frequency-domain regression technique (CleanLine, EEGLAB) was used  
242 to attenuate noise from the power line in the brainstem recording. Moreover, because a voltage  
243 amplitude above 20 mV cannot result from the brainstem but represents artefacts such as spurious  
244 muscle activity, the signal was set to zero during episodes of such high voltage. The  
245 electrophysiological recording was then filtered between 100 – 300 Hz since the fundamental  
246 frequency of the speech was in that range (high-pass filter: FIR, transition band from 90 –100 Hz,  
247 stopband attenuation -80 dB, passband ripple 1 dB, order 6862; low-pass filter: FIR, transition band  
248 300 – 360 Hz, stopband attenuation -80 dB, passband ripple 1 dB, order 1054). In particular, the high-  
249 pass filter eliminated neural signals from the cerebral cortex that occur predominantly below 100 Hz.  
250 To avoid transient activity at the beginning of each speech sample, the first ten seconds of each  
251 brainstem recording in response to a speech sample were discarded. The following two minutes of  
252 data were divided into 40 epochs of a duration of 3 s each, and the remaining data were discarded, if  
253 any.

254 The processing of the neural signal did not induce a latency. This was confirmed by  
255 computing the cross-correlation between the processed neural response and the original signal,  
256 demonstrating a maximum correlation at zero temporal delay (Figure 1–figure supplement 1b).

257 As set out above, the first part of the experiment measured the brainstem response to running  
258 speech without background noise. For each subject and each epoch, the cross-correlation of the  
259 brainstem response with the corresponding segment of the fundamental waveform as well as with its  
260 Hilbert transform were computed. A delay of 1 ms of the acoustic signal produced by the earphones  
261 was taken into account. The two cross-correlation functions were interpreted as the real and the  
262 imaginary part of a complex correlation function. For each individual subject, the average of the



263 complex cross-correlation over all epochs was then computed, and the latency at which the amplitude  
264 peaked was determined.

265 The obtained latencies of about 9 ms affirmed that the signal resulted from the auditory  
266 brainstem and not from the cerebral cortex, whose latencies exceed 20 ms. The latency also evidenced  
267 that the signal resulted neither from stimulus artifacts nor from the cochlear microphonic, which  
268 would occur at or near zero delay (Skoe & Kraus 2010). As an additional control, the brainstem  
269 response was recorded when the earphones were near the ear, but not inserted into the ear canal, so  
270 the subject could not hear the speech signals. The recording did then not yield a measurable brainstem  
271 response (Figure 1–figure supplement 1c). Two presentations of the same speech stimulus, but with  
272 opposite polarities, were employed as well, and the neural response to both presentations was  
273 averaged before computing the correlation to the fundamental waveform. The correlation was  
274 identical to that obtained by a single stimulus presentation, demonstrating the absence of a stimulus  
275 artifact and of the cochlear microphonic (Figure 1–figure supplement 1d).

276 To determine whether the peak in the cross-correlation obtained from a given subject was  
277 significant, the values of the complex cross-correlation from the individual epochs, and at the peak  
278 latency, were analysed. Because each correlation value is an average of many measurements, it  
279 follows from the Central Limit Theorem that the complex correlations from the different epochs  
280 exhibit a two-dimensional normal distribution with a mean of zero if the measurements are randomly  
281 distributed. A one-sample Hotelling's T-squared test was therefore used to assess the significance of  
282 the complex correlation at the peak latency. Two subjects who did not show a significant correlation  
283 ( $p > 0.05$ ) were not included in the further analysis.

284 The population mean and standard error of the mean of the latency were computed from the  
285 latencies of the individual subjects.

286 The brainstem responses to competing speakers were then analysed for each individual  
287 subject. For each epoch, the complex cross-correlation between the brainstem response and the  
288 fundamental waveform was computed, both for the fundamental waveform of the attended and for  
289 that of the unattended speaker. The corresponding complex correlation functions were averaged  
290 across epochs, and the amplitudes as well as latencies of the peaks were determined.

291 Statistical significance of the difference in latency of the brainstem responses to the attended  
292 and the unattended speaker, obtained from the eight samples, was tested by computing population  
293 mean as well as standard error of the mean for the differences in latencies obtained from individual  
294 subjects. A two-tailed Student's t-test was employed to test if the difference was significantly different  
295 from zero.

296 To control for differences in the voice of the male and the female speaker, differences in  
297 amplitude of the brainstem response to the attended and ignored male speaker were determined  
298 separately from differences in the amplitude of the brainstem response to the attended and ignored  
299 female speaker. The amplitudes of the complex cross-correlations, at the peak latencies, were  
300 computed for all epochs. A two-sample Student's t-test was then employed to test for a significant  
301 difference between the amplitude in response to the attended and the ignored speaker.

302 The amplitude of the brainstem response to speech can vary widely between subjects (Figure 2), due  
303 to variations such as in anatomy and scalp conductivity. The ratios of the amplitudes of the brainstem  
304 responses to attended and ignored speech, rather than the differences, were thus computed for each  
305 individual. The population mean and standard error of the mean were therefrom obtained. A one-  
306 tailed Student's t-test assessed whether the population average of the ratio was significantly larger  
307 than unity. A two-tailed two-sample Student's t-test was employed to assess whether the ratios  
308 obtained from the responses to the male and to the female speaker were significantly different.

309

### 310 **Acknowledgement**

311 We thank Steve Bell, Karolina Kluk-de Kort, Patrick Naylor, David Simpson and Malcolm Slaney for  
312 discussion as well as for comments on the manuscript. This research was supported by EPSRC grant  
313 EP/M026728/1 to T.R. as well as in part by the National Science Foundation under Grant No. NSF  
314 PHY-1125915.

315

### 316 **Competing financial interests**

317 The authors declare no competing financial interests.

318

### 319 **References**

- 320 Aiken, S.J. & Picton, T.W., 2008. Envelope and spectral frequency-following responses to vowel  
321 sounds. *Hear. Res.*, 245(1–2), pp.35–47.
- 322 Bajo, V.M., Nodal, F.R., Moore, D.R. & King, A.J., 2010. The descending corticocollicular pathway  
323 mediates learning-induced auditory plasticity. *Nat. Neurosci.*, 13(2), pp.253–260.
- 324 Brix, R., 1984. The influence of attention on the auditory brain stem evoked responses preliminary  
325 report. *Acta Otolaryngol.*, 98(1–2), pp.89–92.
- 326 Chandrasekaran, B. & Kraus, N., 2010. The scalp-recorded brainstem response to speech: neural

- 327 origins and plasticity. *Psychophysiology*, 47(2), pp.236–246.
- 328 Choi, I., Rajaram, S., Varghese, L.A. & Shinn-Cunningham, B.G., 2013. Quantifying attentional  
329 modulation of auditory-evoked cortical responses from single-trial electroencephalography.  
330 *Front. Hum. Neurosci.*, 7, p.115.
- 331 Ding, N. & Simon, J.Z., 2012. Emergence of neural encoding of auditory objects while listening to  
332 competing speakers. *Proc. Natl. Acad. Sci. U. S. A.*, 109(29), pp.11854–9.
- 333 Forte, A.E., 2017. Fundamental\_waveforms\_extraction, GitHub,  
334 [https://github.com/antn85/fundamental\\_waveforms\\_extraction](https://github.com/antn85/fundamental_waveforms_extraction), version 1.
- 335 Fritz, J.B., Elhilali, M., David, S. V. & Shamma, S.A., 2007a. Auditory attention - focusing the  
336 searchlight on sound. *Curr. Opin. Neurobiol.*, 17(4), pp.437–455.
- 337 Fritz, J.B., Elhilali, M., David, S. V. & Shamma, S.A., 2007b. Does attention play a role in dynamic  
338 receptive field adaptation to changing acoustic salience in a1? *Hear. Res.*, 229(1–2), pp.186–  
339 203.
- 340 Galbraith, G.C., Bhuta, S.M., Choate, A.K., Kitahara, J.M. & Mullen, T.A., 1998. Brain stem  
341 frequency-following response to dichotic vowels during attention. *Neuroreport*, 9(8), pp.1889–  
342 1893.
- 343 Galbraith, G.C. & Doan, B.Q., 1995. Brainstem frequency-following and behavioral responses during  
344 selective attention to pure tone and missing fundamental stimuli. *Int. J. Psychophysiol.*, 19(3),  
345 pp.203–214.
- 346 Galbraith, G.C., Olfman, D.M. & Huffman, T.M., 2003. Selective attention affects human brain stem  
347 frequency-following response. *Neuroreport*, 14(5), pp.735–8.
- 348 Gregory, S.D., Heath, J.A. & Rosenberg, M.E., 1989. Does selective attention influence the brain-  
349 stem auditory evoked potential? *Electroencephalogr. Clin. Neurophysiol.*, 73(6), pp.557–60.
- 350 Hackley, S.A., Woldorff, M. & Hillyard, S.A., 1990. Cross-modal selective attention effects on  
351 retinal, myogenic, brainstem, and cerebral evoked potentials. *Psychophysiology*, 27(2), pp.195–  
352 208.
- 353 Hillyard, S.A., Hink, R.F., Schwent, V.L. & Picton, T.W., 1973. Electrical signs of selective attention  
354 in the human brain. *Science*, 182(October), pp.177–180.
- 355 Hoormann, J., Falkenstein, M. & Hohnsbein, J., 2000. Early attention effects in human auditory-  
356 evoked potentials. *Psychophysiology*, 37(1), pp.29–42.
- 357 Huang, H. & Pan, J., 2006. Speech pitch determination based on hilbert-huang transform. *Signal*

- 358 *Process.*, 86(4), pp.792–803.
- 359 Huffman, R.F. & Henson, O.W., 1990. The descending auditory pathway and acousticomotor  
360 systems: connections with the inferior colliculus. *Brain Res. Rev.*, 15(3), pp.295–323.
- 361 Karns, C.M. & Knight, R.T., 2009. Intermodal auditory, visual, and tactile attention modulates early  
362 stages of neural processing. *J. Cogn. Neurosci.*, 21(4), pp.669–83.
- 363 Kujawa, S.G. & Liberman, M.C., 2009. Adding insult to injure: cochlear nerve degeneration after  
364 “temporary” noise- induced hearing loss. *J. Neurosci.*, 29(45), p.14077-.
- 365 Lasky, R.E., 1997. Rate and adaptation effects on the auditory evoked brainstem response in human  
366 newborns and adults. *Hear. Res.*, 111(1–2), pp.165–176.
- 367 Lehmann, A. & Schönwiesner, M., 2014. Selective attention modulates human auditory brainstem  
368 responses: relative contributions of frequency and spatial cues. *PLoS One*, 9(1), pp.1–10.
- 369 Maison, S., Micheyl, C. & Collet, L., 2001. Influence of focused auditory attention on cochlear  
370 activity in humans. *Psychophysiology*, 38(1), pp.35–40.
- 371 Mehraei, G., Hickox, A.E., Bharadwaj, H.M., Goldberg, H., Verhulst, S., Liberman, M.C., Barbara,  
372 X. & Shinn-Cunningham, G., 2016. Auditory brainstem response latency in noise as a marker of  
373 cochlear synaptopathy. *J. Neurosci.*, 36(13), pp.3755–3764.
- 374 Näätänen, R., Tervaniemi, M., Sussman, E., Paavilainen, P. & Winkler, I., 2001. “Primitive  
375 intelligence” in the auditory cortex. *Trends Neurosci.*, 24(5), pp.283–288.
- 376 Neupane, A.K., Gururaj, K., Mehta, G. & Sinha, S.K., 2014. Effect of repetition rate on speech  
377 evoked auditory brainstem response in younger and middle aged individuals. *Audiol. Res.*, 4(1),  
378 pp.21–27.
- 379 Pickels, J.O., 1988. *An introduction to the physiology of hearing*, Emerald.
- 380 Saupe, K., Widmann, A., Bendixen, A., Müller, M.M. & Schröger, E., 2009. Effects of intermodal  
381 attention on the auditory steady-state response and the event-related potential.  
382 *Psychophysiology*, 46(2), pp.321–327.
- 383 Schaette, R. & McAlpine, D., 2011. Tinnitus with a normal audiogram: physiological evidence for  
384 hidden hearing loss and computational model. *J. Neurosci.*, 31(38), pp.13452–13457.
- 385 Shinn-Cunningham, B.G., 2008. Object-based auditory and visual attention. *Trends Cogn. Sci.*,  
386 12(April), pp.182–186.
- 387 Skoe, E. & Kraus, N., 2010. Auditory brain stem response to complex sounds: a tutorial. *Ear Hear.*,  
388 31(3), pp.302–324.

- 389 Sohmer, H., Pratt, H. & Kinarti, R., 1977. Sources of frequency following responses (ffr) in man.  
390 *Electroencephalogr. Clin. Neurophysiol.*, 42(5), pp.656–664.
- 391 Song, J.H., Skoe, E., Wong, P.C.M. & Kraus, N., 2008. Plasticity in the adult human auditory  
392 brainstem following short-term linguistic training. *J. Cogn. Neurosci.*, 20(10), pp.1892–902.
- 393 Varghese, L., Bharadwaj, H.M. & Shinn-Cunningham, B.G., 2015. Evidence against attentional state  
394 modulating scalp-recorded auditory brainstem steady-state responses. *Brain Res.*, 1626, pp.146–  
395 164.
- 396 Winer, J.A., 2006. Decoding the auditory corticofugal systems. *Hear. Res.*, 212(1–2), pp.1–8.
- 397 Womelsdorf, T. & Fries, P., 2007. The role of neuronal synchronization in selective attention. *Curr.*  
398 *Opin. Neurobiol.*, 17(2), pp.154–160.
- 399 Woods, D.L., Alho, K. & Algazi, A., 1992. Intermodal selective attention. i. effects on event-related  
400 potentials to lateralized auditory and visual stimuli. *Electroencephalogr. Clin. Neurophysiol.*,  
401 82(5), pp.341–355.
- 402

403 **Figures**

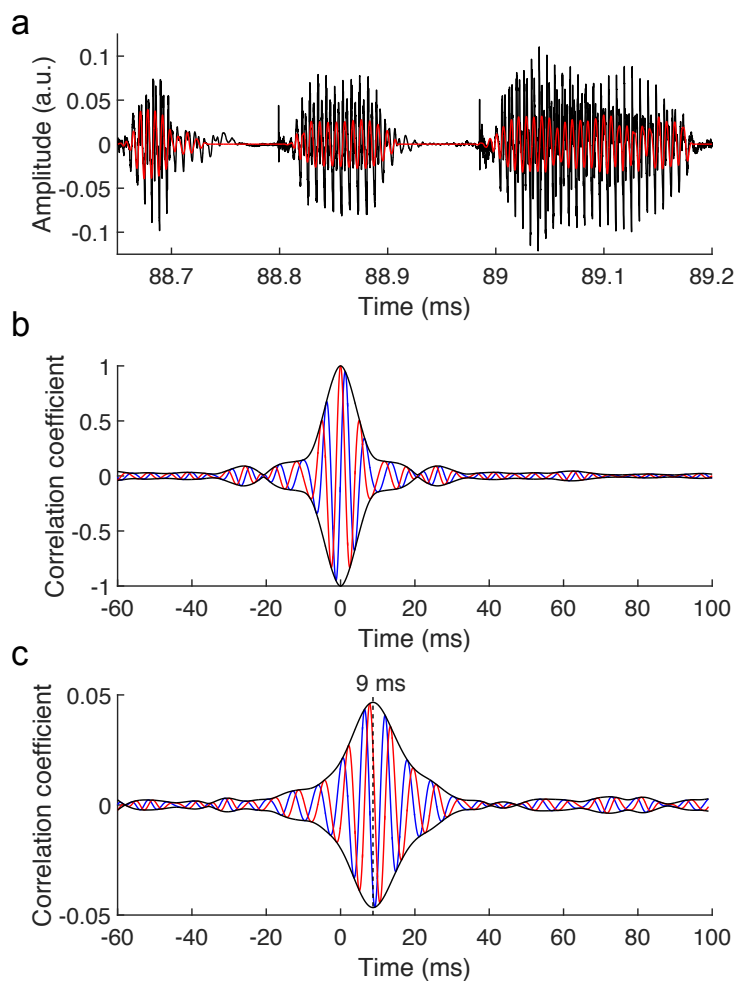

404

405

406 **Figure 1** The brainstem response to running speech. (a) Speech (black) contains voiced parts with  
407 irregular oscillations at a time-varying fundamental frequency and higher harmonics. We extract a  
408 fundamental waveform (red) that oscillates nonlinearly at the fundamental frequency. (b) The  
409 autocorrelation of the fundamental waveform (red) peaks when the delay vanishes and oscillates at the  
410 average fundamental frequency. The cross-correlation of the fundamental waveform with its Hilbert  
411 transform (blue) can be seen as an imaginary part of the autocorrelation. The amplitude of the  
412 resulting complex cross-correlation (black) shows a life-time of a few ms. (c) The correlation of the  
413 speech-evoked brainstem response, recorded from one subject, to the fundamental waveform of the  
414 speech signal (red) as well as to its Hilbert transform (blue) can serve as real and imaginary parts of a  
415 complex correlation function. Its amplitude (black) peaks at a latency of 9 ms. The latency of the  
416 correlation is not altered by the processing of the speech signal or of the neural recording, and  
417 contains neither a stimulus artifact nor the cochlear microphonic (**Figure 1–figure supplement 1**).

418

419

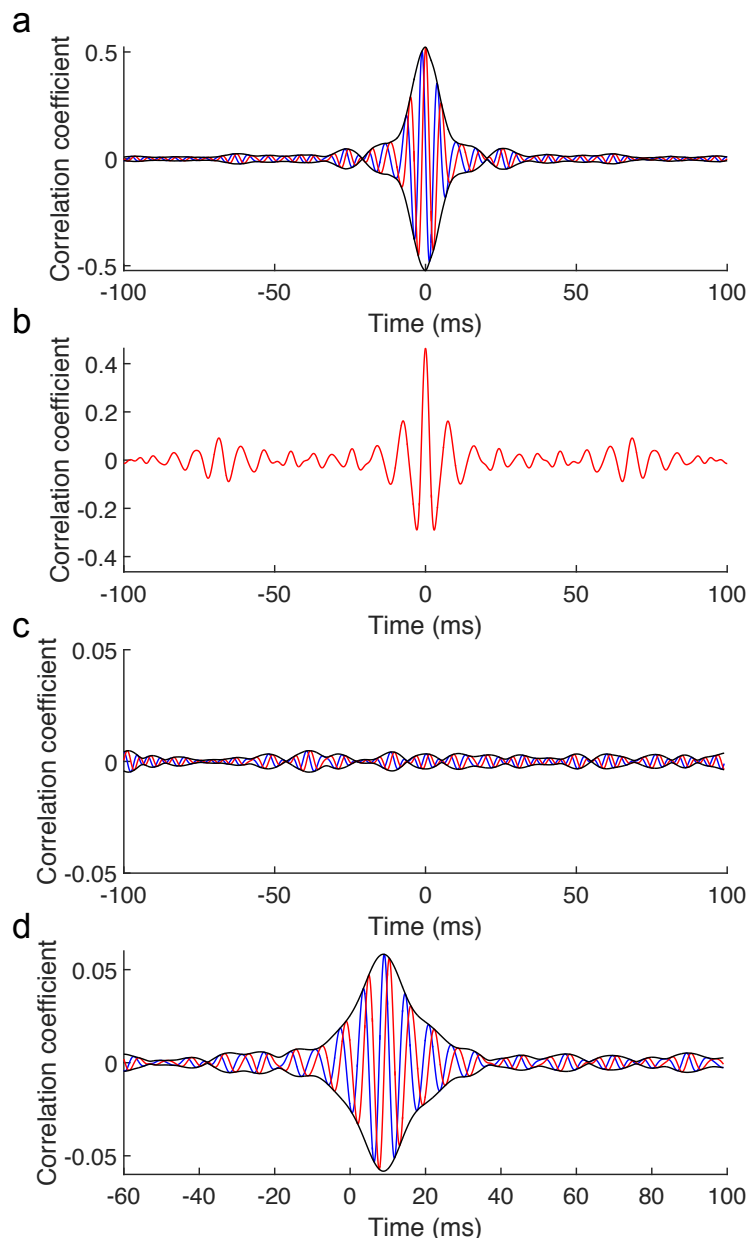

420

421

422 **Figure 1–figure supplement 1.** Controls for latencies induced by signal processing as well as for the  
423 source of the measured brainstem response to running speech. (a) The cross-correlation between the  
424 original speech signal with the fundamental waveform (red) as well as with its Hilbert transform  
425 (blue) and the resulting amplitude (black) show a peak at 0 ms and no phase delay. The processing of  
426 the acoustic signal does accordingly not change the latency or phase of that signal. (b) The  
427 computation of the cross-correlation of the fundamental waveform to the neural recording involved  
428 processing of the neural signal such as through filtering. However, the cross-correlation between the  
429 recorded neural signal and the filtered version shows a peak at vanishing latency. The processing of  
430 the neural signal did therefore not alter the latency. (c) When the earphones are placed close to the  
431 ears, but not inside the ear canal, preventing a subject from hearing the speech signal, the cross-  
432 correlation between the recorded neural signal and the fundamental waveform of speech (red) as well  
433 as its Hilbert transform (blue) do not yield a measurable peak. The amplitude of the resulting complex  
434 correlation function (black) does not peak either, demonstrating the absence of a stimulus artifact. (d)

435 When a subject listened to a speech signal and then to the same signal with reversed polarity, and  
436 when the average over the neural recordings to both stimulus presentations was employed for the  
437 analysis, the complex cross-correlation showed the same structure as when it was computed using the  
438 neural response to one stimulus only. This shows the absence of a stimulus artifact as well as the  
439 absence of the cochlear microphonic in the measured response. To enable comparison, all recordings  
440 were obtained from the same subject for whom we report the exemplary recording in Figure 1 (c).

441

442



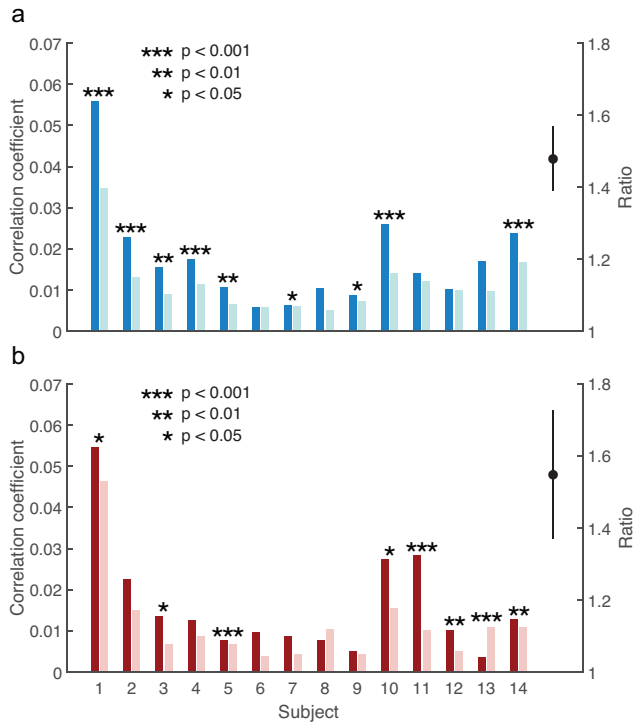

443

444

445 **Figure 2** Modulation of the brainstem response to speech by selective attention. (a) The brainstem's  
446 response to the male speaker is larger for each subject when attending the speaker (dark blue) than  
447 when ignoring it (light blue). The average ratio of the brainstem responses to the attended and to the  
448 ignored male speaker is significantly larger than 1 (black, mean and standard error of the mean). (b)  
449 With the exception of subject 13, the neural response to the female voice is also larger when subjects  
450 attend to it (dark red) instead of ignoring it (light red). The average ratio of the brainstem responses to  
451 the attended and to the ignored female speaker is significantly larger than 1 as well (black, mean and  
452 standard error of the mean).

453
